# Supplementary material for: Pancreatic Stellate Cells Prolong Ex Vivo Islet Viability and Function and Improve Engraftment
Source: PubMed Central journal article supplement — Stem Cells Transl Med. 2022 Apr 19;11(6):630–43. doi: 10.1093/stcltm/szac018 (PMC9216495; doi:10.1093/stcltm/szac018), 2022-04-19
Supplement: szac018_suppl_supplementary_table.pdf [file szac018_suppl_supplementary_table.pdf]

### Supplemental Table 1: Sequences of qPCR primers

Species: *Sus scrofa*

| <b>Gene</b>                     | <b>Forward primer</b>   | <b>Reverse primer</b>   |
|---------------------------------|-------------------------|-------------------------|
| <i>ACTA2</i><br>( $\alpha$ SMA) | GATGGTGGGAATGGGACAAA    | GGTGATGATGCCGTGTTCTAT   |
| <i>DESMIN</i>                   | CAAGCAGGAGATGATGGAGTATC | CCTCATCAGGGAATCGTTAGTG  |
| <i>GFAP</i>                     | GCCAGCAGCTTGAGTTAGAA    | GACAACAGGGATTCAGGAGATG  |
| <i>NESTIN</i>                   | GGGATCTGGACGTGAAAGAAA   | GTGGCTCTTGAATCTCCTCTTC  |
| <i>PROM1</i><br>(CD133)         | GCTAGAGCACGCCTACAATATC  | CCTTCCTCATCCACCTTCATTAC |
| <i>VIMENTIN</i>                 | GAACCTGAGGGAAACCAATCT   | CTCTGGTCTCAACCGTCTTAATC |
| <i>GAPDH</i>                    | ACCTCCACTACATGGTCTACA   | ATGACAAGCTTCCCCTTCT     |
